# Supplementary material for: Validation and Test of Measurement Invariance of the Adapted Health Consciousness Scale (HCS-G)
Source: MDPI journal article supplement (doi:10.3390/ijerph18116044), 2021-06-04
Supplement: s1 [file s1]

**Table S1.** Original and translated items of the health consciousness scale

Scoring of each item: On a 5-point Likert scale from 1=“strongly disagree” to 5=“strongly agree”

| Item code | Original item                                                | Translated item                                                       |
|-----------|--------------------------------------------------------------|-----------------------------------------------------------------------|
| hcon1C    | I reflect about my health a lot.                             | Ich denke viel über meine Gesundheit nach.                            |
| hcon2C    | I'm very self-conscious about my health.                     | Ich beschäftige mich bewusst mit meiner Gesundheit.                   |
| hcon3C    | I'm generally attentive to my inner feeling about my health. | In Bezug auf meine Gesundheit achte ich auf meine Körpersignale.      |
| hcon4I    | I'm constantly examining my health.                          | Ich beobachte regelmäßig meinen Gesundheitszustand.                   |
| hcon5A    | I'm alert to changes in my health.                           | Ich achte auf Veränderungen meines Gesundheitszustands.               |
| hcon6A    | I'm usually aware of my health.                              | Normalerweise bin ich mir bewusst, wie es mir gesundheitlich geht.    |
| hcon7M    | I'm aware of the state of my health as I go through the day. | Im Verlauf des Tages mache ich mir meinen Gesundheitszustand bewusst. |
| hcon8M    | I notice how I feel physically as I go through the day.      | Im Verlauf des Tages achte ich darauf, wie es mir körperlich geht.    |
| hcon9I    | I'm very involved with my health.                            | Ich setze mich aktiv mit meiner Gesundheit auseinander.               |
